# Supplementary material for: Artificial neural network model for predicting changes in ion channel conductance based on cardiac action potential shapes generated via simulation
Source: PubMed Central journal article supplement (PMC8035260; doi:10.1038/s41598-021-87578-0), 2021-04-09
Supplement: 41598_2021_87578_MOESM1_ESM.pdf [file 41598_2021_87578_MOESM1_ESM.pdf]

# Artificial Neural Network Model for Predicting Changes in Ion channel Conductance Based on Cardiac Action Potential Shapes Generated via Simulation

Da Un Jeong<sup>1</sup>, Ki Moo Lim<sup>2\*</sup>

<sup>1</sup>Kumoh National Institute of Technology, IT convergence engineering, Gumi, 39253, Republic of Korea.

<sup>2</sup>Kumog National Institute of Technology, Medical IT convergence engineering, Gumi, 39253, Republic of Korea.

\*kmlim@kumoh.ac.kr

## Supplementary Tables

**Supplementary Table S1.** Sensitivity to the structures of ANN model

|        | Number of hidden layers | F1 score | Accuracy |
|--------|-------------------------|----------|----------|
| Case 1 | 1                       | 0.985    | 0.983    |
| Case 2 | 2                       | 0.982    | 0.983    |
| Case 3 | 3                       | 0.967    | 0.968    |
| Case 4 | 4                       | 0.968    | 0.968    |

**Supplementary Table S2.** Sensitivity to the ratio of the training set and testing set

|        | Ratio of training set and testing set |             | F1 score | Accuracy |
|--------|---------------------------------------|-------------|----------|----------|
|        | ratio                                 | Testing set |          |          |
| Case 1 | 60:40                                 | 792         | 0.989    | 0.989    |
| Case 2 | 70:30                                 | 594         | 0.993    | 0.992    |
| Case 3 | 75:25                                 | 495         | 0.988    | 0.988    |
| Case 4 | 80:20                                 | 396         | 0.985    | 0.983    |
